# Supplementary material for: 4-Aryldithieno[3,2-b:2′,3′-d]arsoles: effects of the As-substituent on the structure, photophysical properties, and stability
Source: Royal Society of Chemistry journal article supplement (doi:10.1039/d2dt02051c), 2022-01-01
Supplement: d2dt02051c1.pdf [file d2dt02051c1.pdf]

## Supporting Information

# 4-Aryldithieno[3,2-*b*:2',3'-*d*]arsoles: effects of the As-substituent on the structure, photophysical properties, and stability

Chisa Takahara,<sup>[a]</sup> Suzuka Iwasaki,<sup>[a]</sup> Hyota Kihara,<sup>[a]</sup> Yusuke Miyake,<sup>[a]</sup> Hiroaki Imoto\*,<sup>[a]</sup> and Kensuke Naka\*<sup>[a,b]</sup>

[a] Faculty of Molecular Chemistry and Engineering, Graduate School of Science and Technology, Kyoto Institute of Technology, Goshokaido-cho, Matsugasaki, Sakyo-ku, Kyoto 606-8585, Japan

[b] Materials Innovation Lab, Kyoto Institute of Technology, Goshokaido-cho, Matsugasaki, Sakyo-ku, Kyoto 606-8585, Japan.

### Contents:

1. NMR Spectra
2. Generation of DTA bromide 1
3. X-ray crystallographic data for single crystalline products
4. Photophysical data
5. XRD data for crystal polymorphs of 2
6. ESR data
7. DFT calculations



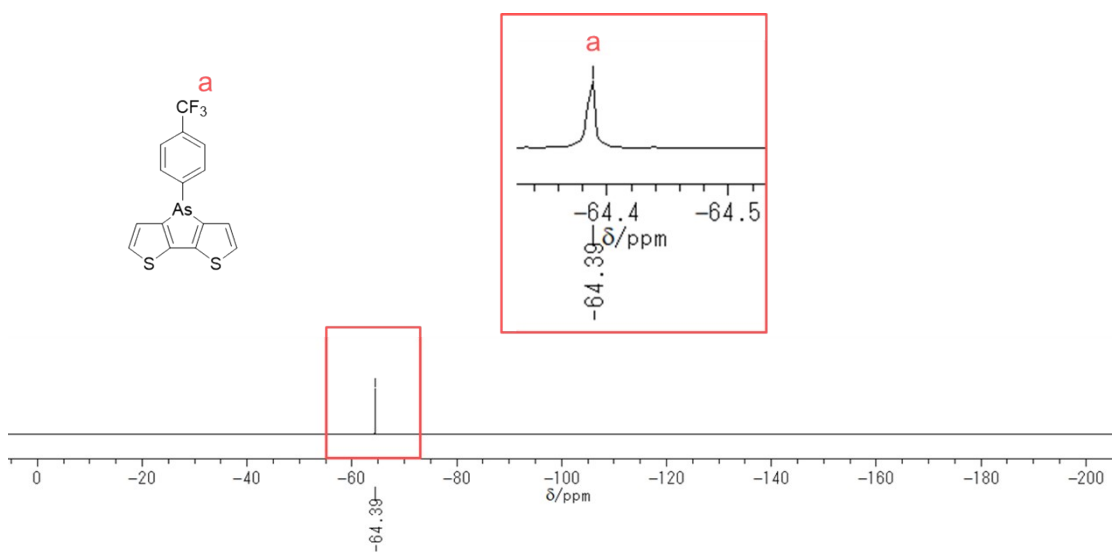

**Figure S3.** <sup>19</sup>F-NMR spectrum (376 MHz) of **3** in Acetone-*d*<sub>6</sub>.

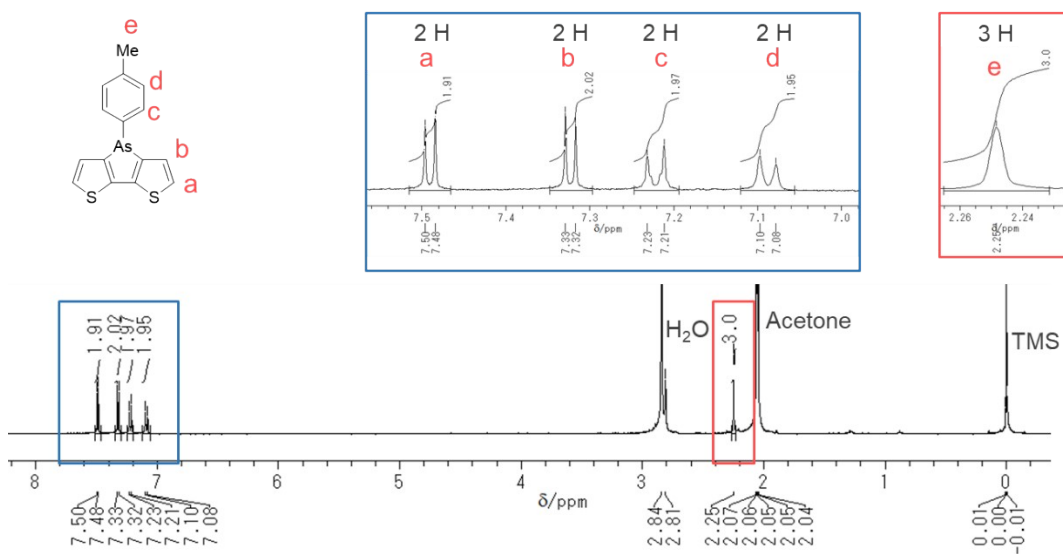

**Figure S4.** <sup>1</sup>H-NMR spectrum (400 MHz) of **4** in Acetone-*d*<sub>6</sub>.

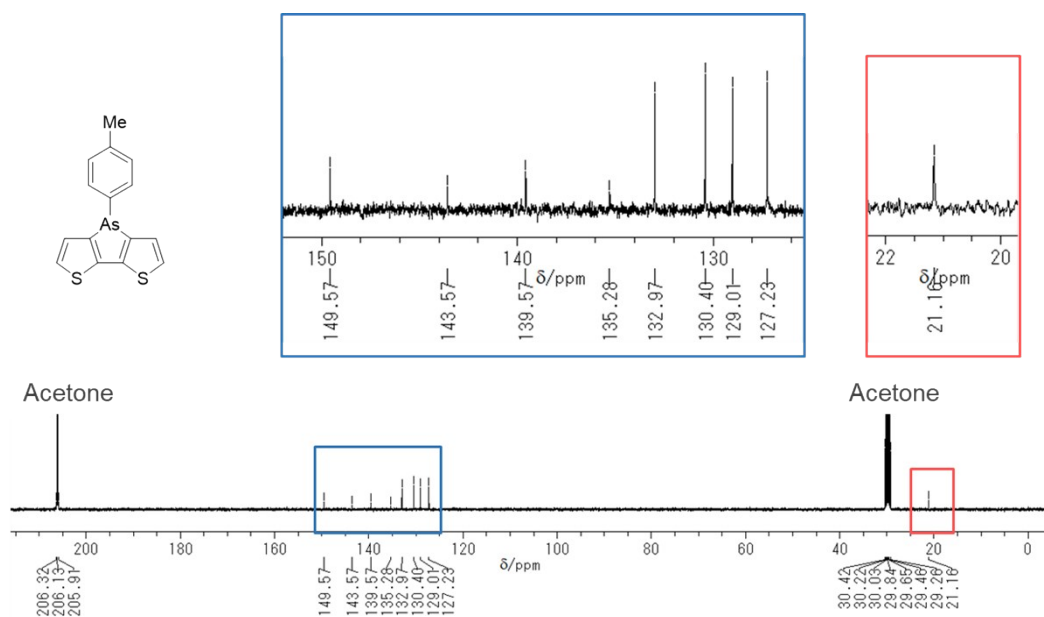

**Figure S5.** <sup>13</sup>C-NMR spectrum (100 MHz) of 4 in Acetone-*d*<sub>6</sub>.

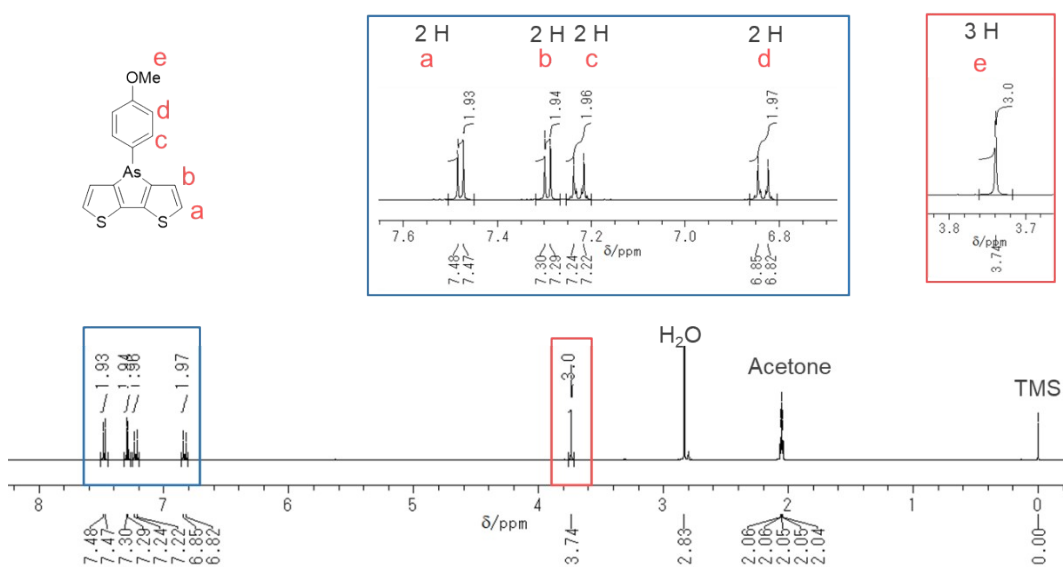

**Figure S6.** <sup>1</sup>H-NMR spectrum (400 MHz) of 5 in Acetone-*d*<sub>6</sub>.

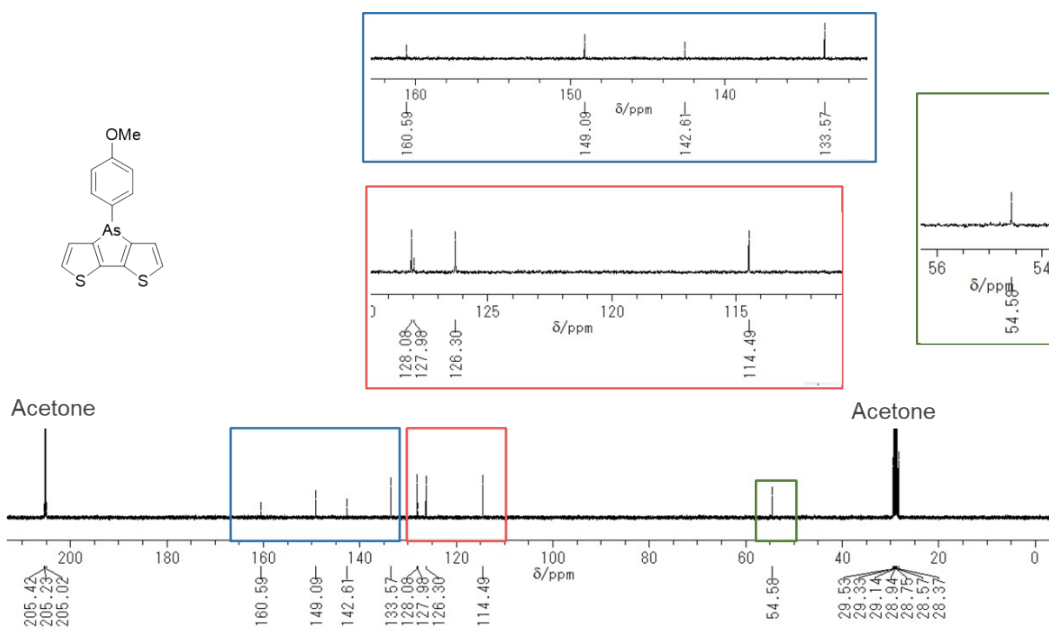

**Figure S7.** <sup>13</sup>C-NMR spectrum (100 MHz) of **5** in Acetone-*d*<sub>6</sub>.

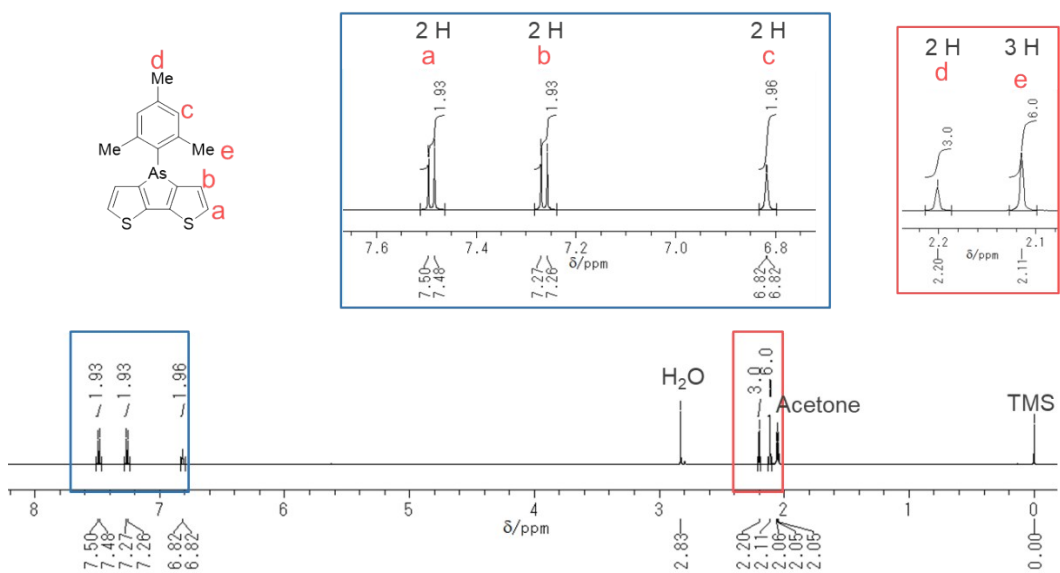

**Figure S8.** <sup>1</sup>H-NMR spectrum (400 MHz) of **6** in Acetone-*d*<sub>6</sub>.

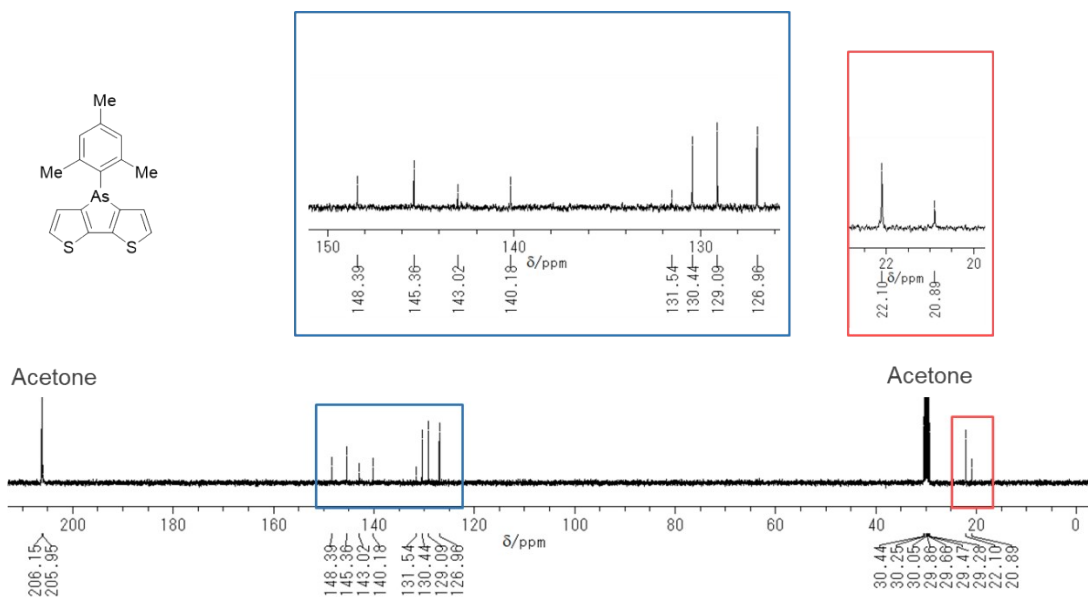

**Figure S9.** <sup>13</sup>C-NMR spectrum (100 MHz) of **6** in Acetone-*d*<sub>6</sub>.

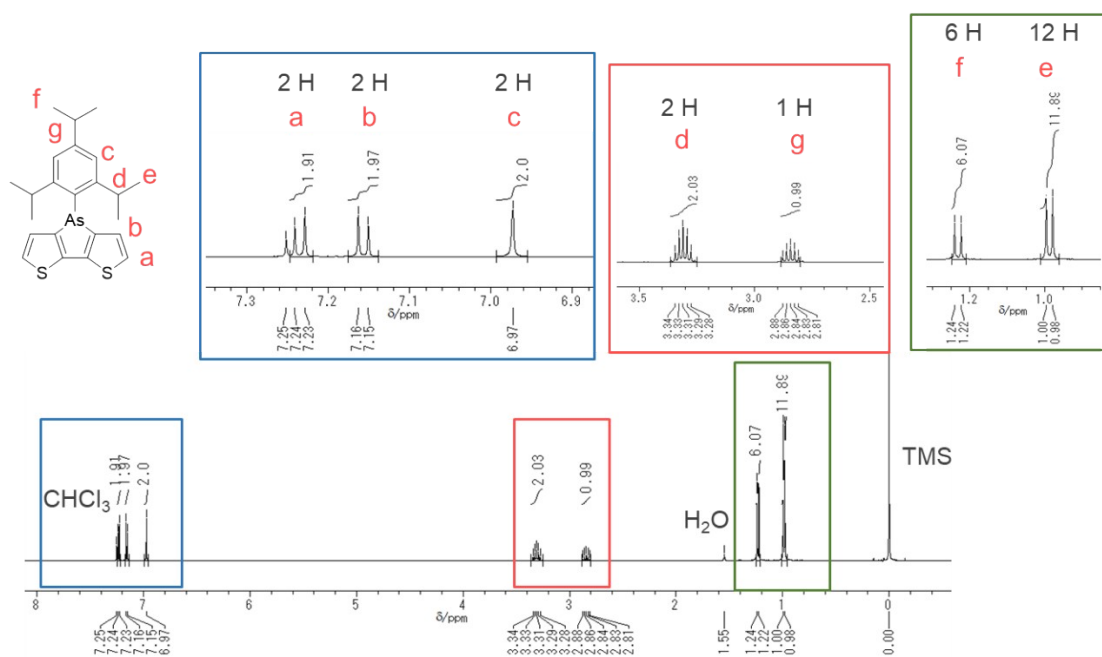

**Figure S10.** <sup>1</sup>H-NMR spectrum (400 MHz) of **7** in Acetone-*d*<sub>6</sub>.

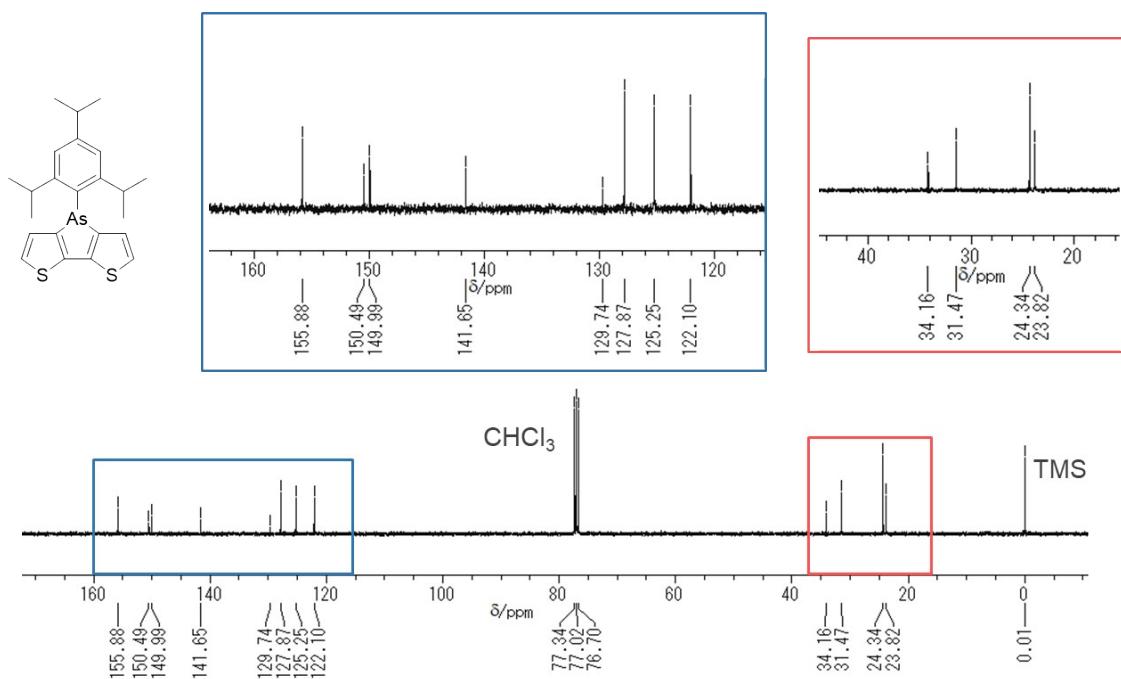

**Figure S11.** <sup>13</sup>C-NMR spectrum (100 MHz) of **7** in Acetone-*d*<sub>6</sub>.

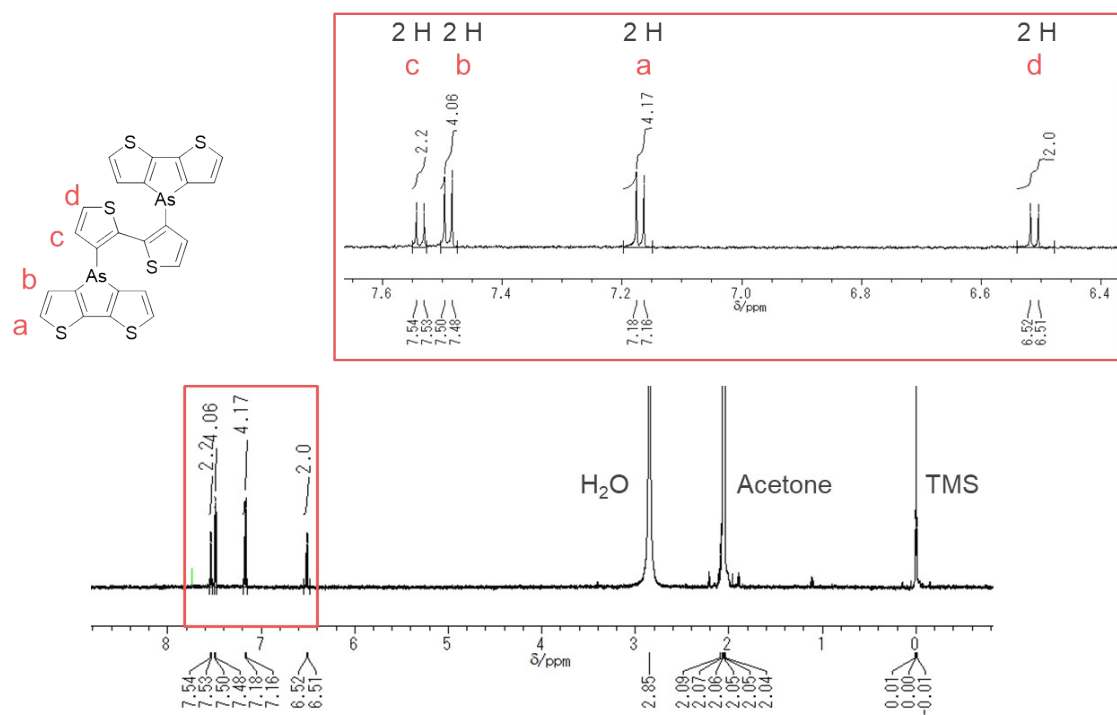

**Figure S12.** <sup>1</sup>H-NMR spectrum (400 MHz) of **1'** in Acetone-*d*<sub>6</sub>.

## 2. Generation of DTA bromide 1

*Generation of 4-bromodithieno[3,2-b:2',3'-d]arsole (1) and 4-iododithieno[3,2-b:2',3'-d]arsole.*

To an Et<sub>2</sub>O solution (40 mL) of 3,3'-dibromo-2,2'-bithiophene (324 mg, 1.0 mmol) was added *n*-BuLi (1.6 M in *n*-hexane, 1.3 mL, 2.1 mmol) at -78 °C under N<sub>2</sub> atmosphere. The reaction solution was warmed to room temperature, and stirred for 30 min at room temperature. The resultant solution was slowly added to an Et<sub>2</sub>O solution (7.3 mL) of AsBr<sub>3</sub> (316 mg, 1.0 mmol) with a cannula at 0 °C under N<sub>2</sub> atmosphere. The reaction solution was warmed to room temperature, and stirred for 3 h to prepare solution of **1**. Under ambient condition, **1** was gradually decomposed, and thus we failed isolation of **1**. The generation of **1** was confirmed by <sup>1</sup>H-NMR spectrum. <sup>1</sup>H-NMR (Acetone-*d*<sub>6</sub>, 400 MHz): δ 7.46 (d, *J* = 4.8 Hz, 2H), 7.34 (d, *J* = 4.8 Hz, 2H) ppm.

Then, the solvents were removed *in vacuo*, and KI (300 mg, 2.0 mmol) and acetone (40 mL) were added to the residue at room temperature under N<sub>2</sub> atmosphere. The reaction mixture was stirred overnight, and the solvents were removed *in vacuo*. The residue was washed with EtOH and *n*-hexane, extracted with Et<sub>2</sub>O, and purified by recrystallization from CH<sub>2</sub>Cl<sub>2</sub>/MeOH to obtain 4-iododithieno[3,2-b:2',3'-d]arsole (42 mg, 0.11 mmol, 11%) as dark red solids. <sup>1</sup>H-NMR (Acetone-*d*<sub>6</sub>, 400 MHz): δ 7.53 (d, *J* = 4.8 Hz, 2H), 7.40 (d, *J* = 4.8 Hz, 2H) ppm.

*Synthesis of DTA dimer 1' (shown in Scheme 2b of the main text).*

To an Et<sub>2</sub>O solution (10 mL) of 3,3'-dibromo-2,2'-bithiophene (324 mg, 1.0 mmol) was added *n*-BuLi (1.6 M in *n*-hexane, 1.3 mL, 2.1 mmol) at -78 °C under N<sub>2</sub> atmosphere. The reaction solution was warmed to room temperature, and stirred for 30 min at room temperature. The reaction solution was cooled to -78 °C again, and an Et<sub>2</sub>O solution (3 mL) of AsBr<sub>3</sub> (316 mg, 1.0 mmol) was added. The reaction solution was warmed to room temperature, and stirred overnight. The reaction was quenched by addition of distilled water at 0 °C. The volatiles were removed *in vacuo*, and the residue was washed with Et<sub>2</sub>O to obtain **1'** (128 mg, 0.20 mmol, 40%) as yellow solids. <sup>1</sup>H-NMR (Acetone-*d*<sub>6</sub>, 400 MHz): δ 7.54 (d, *J* = 5.2 Hz, 2H), 7.49 (d, *J* = 5.2 Hz, 2H), 7.17 (d, *J* = 5.2 Hz, 2H), 6.51 (d, *J* = 5.2 Hz, 2H) ppm. <sup>13</sup>C-NMR spectrum was unable to be measured because of the low solubility. HR-FAB-MASS: (m/z): calculated for C<sub>24</sub>H<sub>13</sub>S<sub>6</sub>As<sub>2</sub> [M+H]<sup>+</sup>: 641.7695, found: 642.7781.



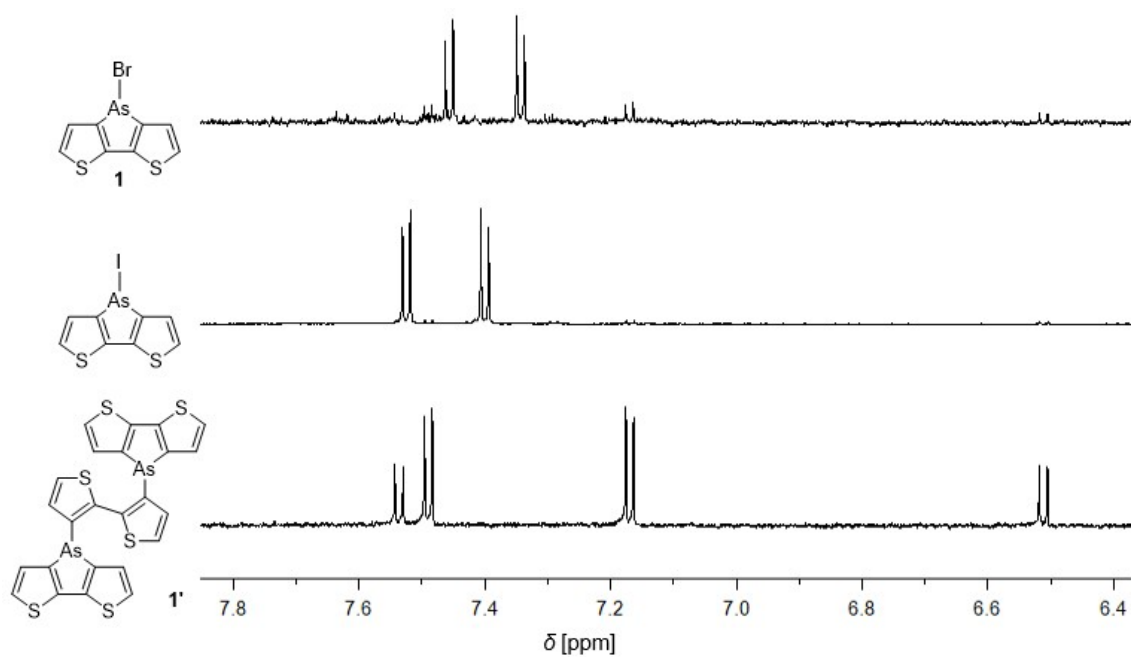

**Figure S13.** <sup>1</sup>H-NMR spectra (400 MHz) of **1** (crude), 4-iododithieno[3,2-*b*:2',3'-*d*]arsole, and **1'** in Acetone-*d*<sub>6</sub>.

### 3. X-ray crystallographic data for single crystalline products

**Table S1.** Crystallographic Data of **2-1**, **3** and **4**.

|                                         | <b>2-1</b>                                      | <b>3</b>                                                       | <b>4</b>                                         |
|-----------------------------------------|-------------------------------------------------|----------------------------------------------------------------|--------------------------------------------------|
| Crystal data                            |                                                 |                                                                |                                                  |
| Empirical Formula                       | C <sub>14</sub> H <sub>9</sub> AsS <sub>2</sub> | C <sub>15</sub> H <sub>8</sub> AsF <sub>3</sub> S <sub>2</sub> | C <sub>15</sub> H <sub>11</sub> AsS <sub>2</sub> |
| Formula Weight                          | 316.25                                          | 384.25                                                         | 330.28                                           |
| Crystal Dimension, mm <sup>3</sup>      | 0.42 × 0.17 × 0.04                              | 0.28 × 0.21 × 0.19                                             | 0.88 × 0.67 × 0.37                               |
| Crystal System                          | orthorhombic                                    | orthorhombic                                                   | orthorhombic                                     |
| Space Group                             | <i>Pna</i> 2 <sub>1</sub>                       | <i>Pna</i> 2 <sub>1</sub>                                      | <i>Pna</i> 2 <sub>1</sub>                        |
| a, Å                                    | 12.6354(8)                                      | 12.886(18)                                                     | 12.610(12)                                       |
| b, Å                                    | 5.8417(7)                                       | 5.795(8)                                                       | 5.954(6)                                         |
| c, Å                                    | 33.241(3)                                       | 38.75(7)                                                       | 36.39(3)                                         |
| α, deg                                  | 90                                              | 90                                                             | 90                                               |
| β, deg                                  | 90                                              | 90                                                             | 90                                               |
| γ, deg                                  | 90                                              | 90                                                             | 90                                               |
| Volume, Å <sup>3</sup>                  | 2453.6(4)                                       | 2893(8)                                                        | 2732(4)                                          |
| D <sub>calcd</sub> , g cm <sup>-3</sup> | 1.712                                           | 1.764                                                          | 1.606                                            |
| Z                                       | 8                                               | 8                                                              | 8                                                |
| F(000)                                  | 1264.0                                          | 1520.0                                                         | 1328.0                                           |
| Data Collection                         |                                                 |                                                                |                                                  |
| Temperature, deg                        | -180                                            | 25                                                             | 25                                               |
| 2θmax, deg                              | 52.7                                            | 52.7                                                           | 65.2                                             |
| Tmin/Tmax                               | 0.056 / 0.514                                   | 0.211 / 1.000                                                  | 0.747 / 0.886                                    |
| Refinement                              |                                                 |                                                                |                                                  |
| No. of Observed Data                    | 4214                                            | 5509                                                           | 6651                                             |
| No. of Parameters                       | 307                                             | 411                                                            | 303                                              |
| R1 <sup>a</sup> , wR2 <sup>b</sup>      | 0.0463, 0.0984                                  | 0.0488, 0.1169                                                 | 0.0600, 0.1841                                   |
| Goodness of Fit Indicator               | 1.019                                           | 1.026                                                          | 0.838                                            |

$${}^aR1 = \sum ||F_o| - |F_c|| / \sum |F_o| \quad {}^bwR2 = [\sum w ((F_o^2 - F_c^2)^2 / \sum w (F_o^2)^2)]^{1/2} \quad w = [\sigma^2(F_o^2)]^{-1}$$

CCDC# 2173950 (**2-1**), 2173953 (**3**), 2173951 (**4**)

**Table S2.** Crystallographic Data of **5-7**.

|                                         | <b>5</b>                                          | <b>6</b>                                         | <b>7</b>                                         |
|-----------------------------------------|---------------------------------------------------|--------------------------------------------------|--------------------------------------------------|
| Crystal data                            |                                                   |                                                  |                                                  |
| Empirical Formula                       | C <sub>15</sub> H <sub>11</sub> AsOS <sub>2</sub> | C <sub>17</sub> H <sub>15</sub> AsS <sub>2</sub> | C <sub>23</sub> H <sub>27</sub> AsS <sub>2</sub> |
| Formula Weight                          | 346.28                                            | 358.33                                           | 442.48                                           |
| Crystal Dimension, mm <sup>3</sup>      | 0.82 × 0.38 × 0.27                                | 0.55 × 0.198 × 0.11                              | 0.74 × 0.27 × 0.17                               |
| Crystal System                          | monoclinic                                        | triclinic                                        | monoclinic                                       |
| Space Group                             | <i>Cc</i>                                         | <i>P</i> -1                                      | <i>P</i> 2 <sub>1</sub> / <i>c</i>               |
| a, Å                                    | 10.729(6)                                         | 8.343(5)                                         | 10.564(15)                                       |
| b, Å                                    | 16.495(10)                                        | 14.016(8)                                        | 16.002(6)                                        |
| c, Å                                    | 8.178(6)                                          | 14.594(8)                                        | 18.488(3)                                        |
| α, deg                                  | 90                                                | 69.81(5)                                         | 90                                               |
| β, deg                                  | 100.39(7)                                         | 80.16(5)                                         | 135.57(3)                                        |
| γ, deg                                  | 90                                                | 79.86(5)                                         | 90                                               |
| Volume, Å <sup>3</sup>                  | 1423(16)                                          | 1565(17)                                         | 2188(8)                                          |
| D <sub>calcd</sub> , g cm <sup>-3</sup> | 1.616                                             | 1.520                                            | 1.343                                            |
| Z                                       | 4                                                 | 4                                                | 4                                                |
| F(000)                                  | 696.0                                             | 728.0                                            | 920.0                                            |
| Data Collection                         |                                                   |                                                  |                                                  |
| Temperature, deg                        | -180                                              | -180                                             | -180                                             |
| 2θmax, deg                              | 52.7                                              | 52.7                                             | 52.7                                             |
| Tmin/Tmax                               | 0.548 / 1.000                                     | 0.789 / 0.952                                    | 0.984/0.994                                      |
| Refinement                              |                                                   |                                                  |                                                  |
| No. of Observed Data                    | 1730                                              | 6408                                             | 4464                                             |
| No. of Parameters                       | 173                                               | 367                                              | 241                                              |
| R1 <sup>a</sup> , wR2 <sup>b</sup>      | 0.0253, 0.0672                                    | 0.0379, 0.0930                                   | 0.0304, 0.1353                                   |
| Goodness of Fit Indicator               | 1.050                                             | 0.990                                            | 0.612                                            |

$${}^aR1 = \sum ||Fo| - |Fc|| / \sum |Fo| \quad {}^bwR2 = [ \sum w ((Fo^2 - Fc^2)^2 / \sum w (Fo^2)^2 )^{1/2} \quad w = [ \sigma^2(Fo^2) ]^{-1}$$

CCDC# 2173952 (**5**), 2173949 (**6**), 2173954 (**7**)

**Table S3.** Crystallographic Data of **1'** and 4-iododithieno[3,2-*b*:2',3'-*d*]arsole

|                                         | <b>1'</b>                                                      | 4-iododithieno[3,2- <i>b</i> :2',3'- <i>d</i> ]arsole |
|-----------------------------------------|----------------------------------------------------------------|-------------------------------------------------------|
| Crystal data                            |                                                                |                                                       |
| Empirical Formula                       | C <sub>24</sub> H <sub>12</sub> As <sub>2</sub> S <sub>6</sub> | C <sub>8</sub> H <sub>4</sub> AsIS <sub>2</sub>       |
| Formula Weight                          | 642.54                                                         | 366.05                                                |
| Crystal Dimension, mm <sup>3</sup>      | 0.869 × 0.367 × 0.154                                          | 0.638 × 0.271 × 0.148                                 |
| Crystal System                          | triclinic                                                      | monoclinic                                            |
| Space Group                             | <i>P</i> -1                                                    | <i>I</i> 2/ <i>a</i>                                  |
| a, Å                                    | 8.305(6)                                                       | 14.292(10)                                            |
| b, Å                                    | 10.006(7)                                                      | 4.979(4)                                              |
| c, Å                                    | 14.215(10)                                                     | 28.392(17)                                            |
| α, deg                                  | 84.62(6)                                                       | 90                                                    |
| β, deg                                  | 87.42(4)                                                       | 91.38(6)                                              |
| γ, deg                                  | 88.56(6)                                                       | 90                                                    |
| Volume, Å <sup>3</sup>                  | 1175(14)                                                       | 2020(2)                                               |
| D <sub>calcd</sub> , g cm <sup>-3</sup> | 1.817                                                          | 2.407                                                 |
| Z                                       | 2                                                              | 8                                                     |
| F(000)                                  | 636.0                                                          | 1360.0                                                |
| Data Collection                         |                                                                |                                                       |
| Temperature, deg                        | -180                                                           | 25                                                    |
| 2θmax, deg                              | 52.7                                                           | 52.7                                                  |
| Tmin/Tmax                               | 0.388 / 0.799                                                  | 0.848 / 0.948                                         |
| Refinement                              |                                                                |                                                       |
| No. of Observed Data                    | 4796                                                           | 2059                                                  |
| No. of Parameters                       | 289                                                            | 109                                                   |
| R1 <sup>a</sup> , wR2 <sup>b</sup>      | 0.0514, 0.1372                                                 | 0.0280, 0.0735                                        |
| Goodness of Fit Indicator               | 1.015                                                          | 1.098                                                 |

$${}^aR1 = \sum ||F_o| - |F_c|| / \sum |F_o| \quad {}^b wR2 = [ \sum w ((F_o^2 - F_c^2)^2 / \sum w (F_o^2)^2 )^{1/2} \quad w = [ \sigma^2(F_o^2) ]^{-1}$$

CCDC# 2173955 (**1'**) and 2173948 (4-iododithieno[3,2-*b*:2',3'-*d*]arsole)

**Table S4.** ORTEP and selected bond lengths and angles of **2-1**.

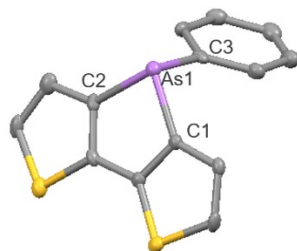

|            | distance(Å) |                 | angle(°) |
|------------|-------------|-----------------|----------|
| As(1)-C(1) | 1.94(1)     | C(1)-As(1)-C(2) | 85.5(4)  |
| As(1)-C(2) | 1.95(1)     | C(1)-As(1)-C(3) | 98.1(4)  |
| As(1)-C(3) | 1.96(1)     | C(2)-As(1)-C(3) | 98.2(4)  |

**Table S5.** ORTEP and selected bond lengths and angles of **3**.

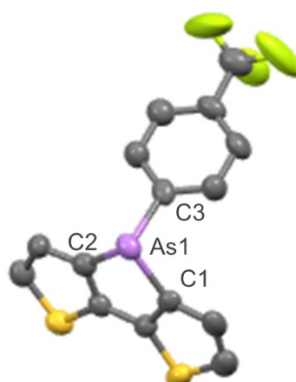

|            | distance(Å) |                 | angle(°) |
|------------|-------------|-----------------|----------|
| As(1)-C(1) | 1.95(1)     | C(1)-As(1)-C(2) | 86.3(4)  |
| As(1)-C(2) | 1.92(1)     | C(1)-As(1)-C(3) | 98.7(3)  |
| As(1)-C(3) | 1.96(5)     | C(2)-As(1)-C(3) | 99.3(3)  |

**Table S6.** ORTEP and selected bond lengths and angles of **4**.

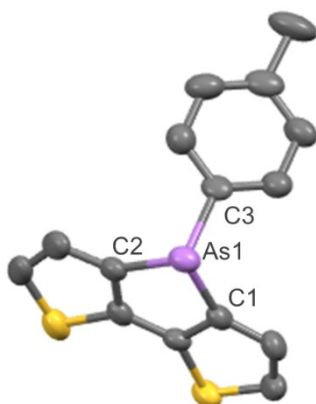

|            | distance(Å) |                 | angle(°) |
|------------|-------------|-----------------|----------|
| As(1)-C(1) | 1.95(1)     | C(1)-As(1)-C(2) | 85.9(4)  |
| As(1)-C(2) | 1.94(1)     | C(1)-As(1)-C(3) | 97.9(3)  |
| As(1)-C(3) | 1.98(5)     | C(2)-As(1)-C(3) | 99.6(3)  |

**Table S7.** ORTEP and selected bond lengths and angles of **5**.

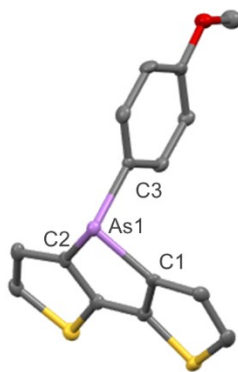

|            | distance(Å) |                 | angle(°) |
|------------|-------------|-----------------|----------|
| As(1)-C(1) | 1.96(4)     | C(1)-As(1)-C(2) | 85.2(2)  |
| As(1)-C(2) | 1.95(4)     | C(1)-As(1)-C(3) | 99.5(2)  |
| As(1)-C(3) | 1.96(4)     | C(2)-As(1)-C(3) | 100.1(2) |

**Table S8.** ORTEP and selected bond lengths and angles of **6**.

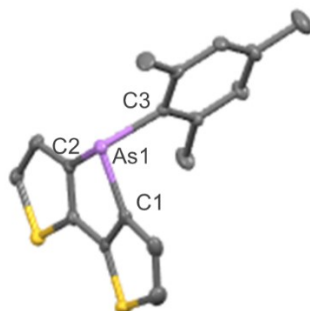

|            | distance(Å) |                 | angle(°) |
|------------|-------------|-----------------|----------|
| As(1)-C(1) | 1.96(4)     | C(1)-As(1)-C(2) | 85.2(2)  |
| As(1)-C(2) | 1.95(4)     | C(1)-As(1)-C(3) | 99.5(2)  |
| As(1)-C(3) | 1.96(4)     | C(2)-As(1)-C(3) | 100.1(2) |

**Table S9.** ORTEP and selected bond lengths and angles of **7**.

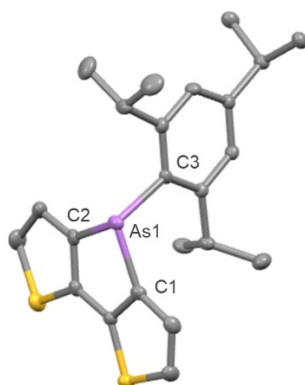

|            | distance(Å) |                 | angle(°) |
|------------|-------------|-----------------|----------|
| As(1)-C(1) | 1.96(2)     | C(1)-As(1)-C(2) | 85.8(1)  |
| As(1)-C(2) | 1.95(3)     | C(1)-As(1)-C(3) | 110.5(1) |
| As(1)-C(3) | 2.00(2)     | C(2)-As(1)-C(3) | 99.3(1)  |

**Table S10.** ORTEP and selected bond lengths and angles of **1'**.

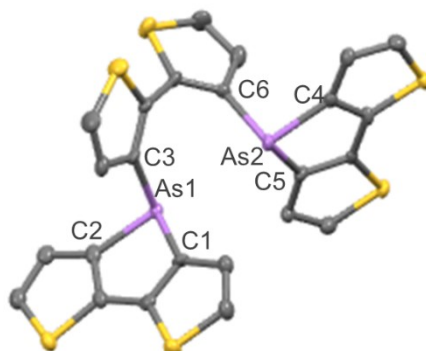

|            | distance(Å) |                 | angle(°) |
|------------|-------------|-----------------|----------|
| As(1)-C(1) | 1.96(5)     | C(1)-As(1)-C(2) | 84.9(2)  |
| As(1)-C(2) | 1.97(5)     | C(1)-As(1)-C(3) | 97.7(2)  |
| As(1)-C(3) | 1.95(6)     | C(2)-As(1)-C(3) | 100.7(2) |
| As(2)-C(4) | 1.94(5)     | C(4)-As(2)-C(5) | 85.2(2)  |
| As(2)-C(5) | 1.96(6)     | C(4)-As(2)-C(6) | 97.4(2)  |
| As(2)-C(6) | 1.95(6)     | C(5)-As(2)-C(6) | 101.3(2) |

**Table S11.** ORTEP and selected bond lengths and angles of 4-iododithieno[3,2-*b*:2',3'-*d*]arsole.

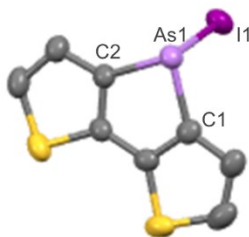

|            | distance(Å) |                 | angle(°) |
|------------|-------------|-----------------|----------|
| As(1)-C(1) | 1.96(5)     | C(1)-As(1)-C(2) | 97.6(1)  |
| As(1)-C(2) | 1.96(5)     | C(1)-As(1)-I(1) | 84.9(1)  |
| As(1)-I(1) | 2.60(6)     | C(2)-As(1)-I(1) | 98.1(1)  |



**Table S12.** Wiberg bond indices (WBI) of the As–C, C=C, and C–C bonds in the arsole rings for the crystal structures.<sup>[a]</sup>

|            | As–C       | C=C        | C–C  |
|------------|------------|------------|------|
| <b>2-1</b> | 0.91, 0.90 | 1.51, 1.49 | 1.11 |
| <b>3</b>   | 0.90, 0.90 | 1.51, 1.48 | 1.12 |
| <b>4</b>   | 0.90, 0.90 | 1.47, 1.47 | 1.14 |
| <b>5</b>   | 0.89, 0.89 | 1.49, 1.49 | 1.12 |
| <b>6</b>   | 0.90, 0.89 | 1.49, 1.48 | 1.12 |
| <b>7</b>   | 0.90, 0.89 | 1.49, 1.48 | 1.13 |

[a] Estimated by DFT calculations (B3LYP/def2tzvp)

#### 4. Photophysical data

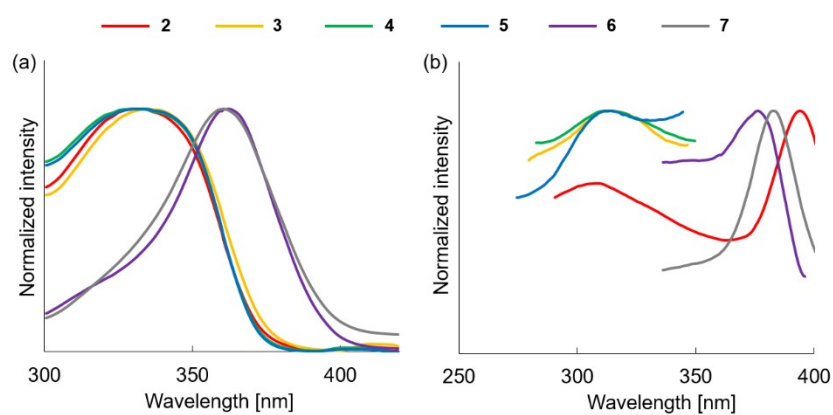

**Figure S14.** Excitation spectra (monitored at emission maxima) of **2-7** measured in (a) solutions ( $1.0 \times 10^{-4}$  mol/L in THF) and (b) the solid states at 298 K.

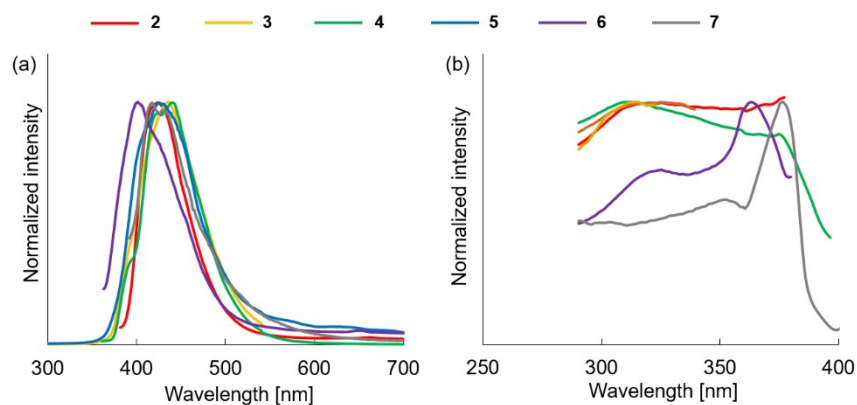

**Figure S15.** (a) Emission (excited at excitation maxima) and (b) excitation (monitored at emission maxima) spectra of **2-7** measured in the solid states at 77 K.

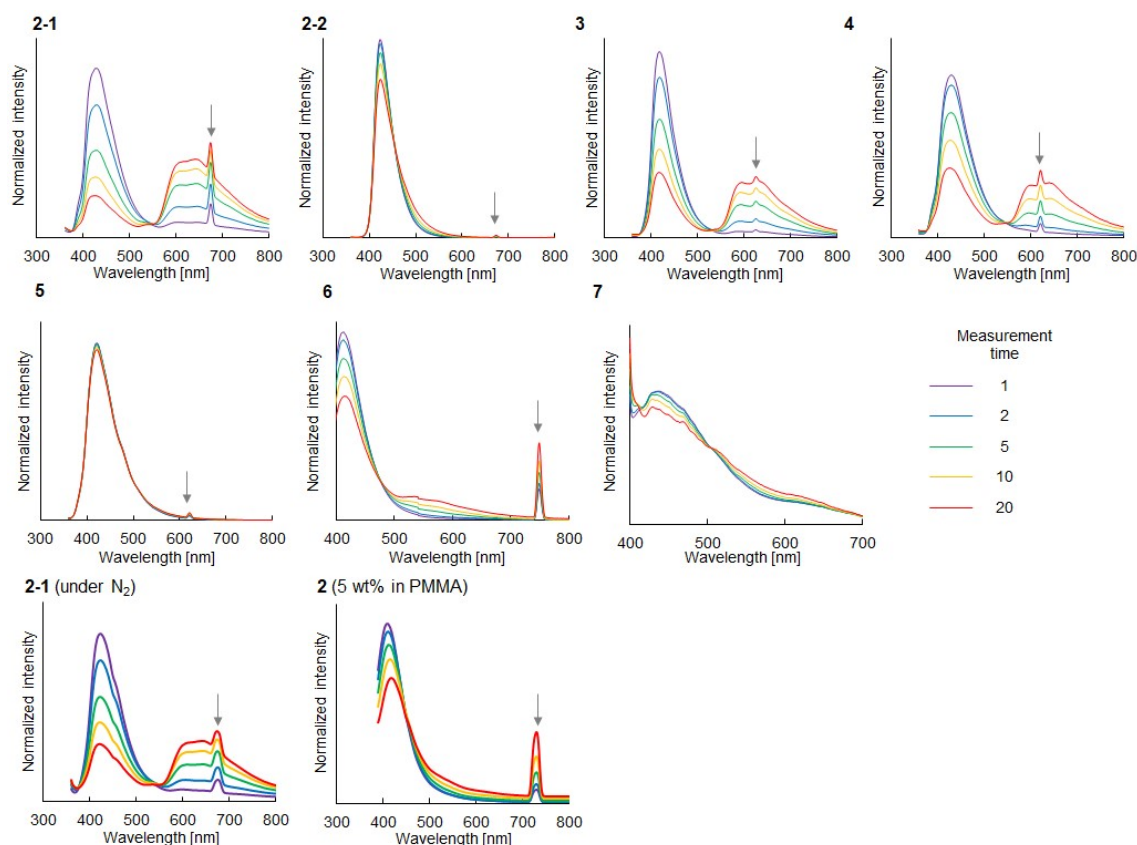

**Figure S16.** PL spectra of **2-1**, **2-2**, **3-7**, **2-1** (under  $N_2$ ), and **2** (5 wt% in PMMA) measured 20 times. Arrows indicate light scattering.

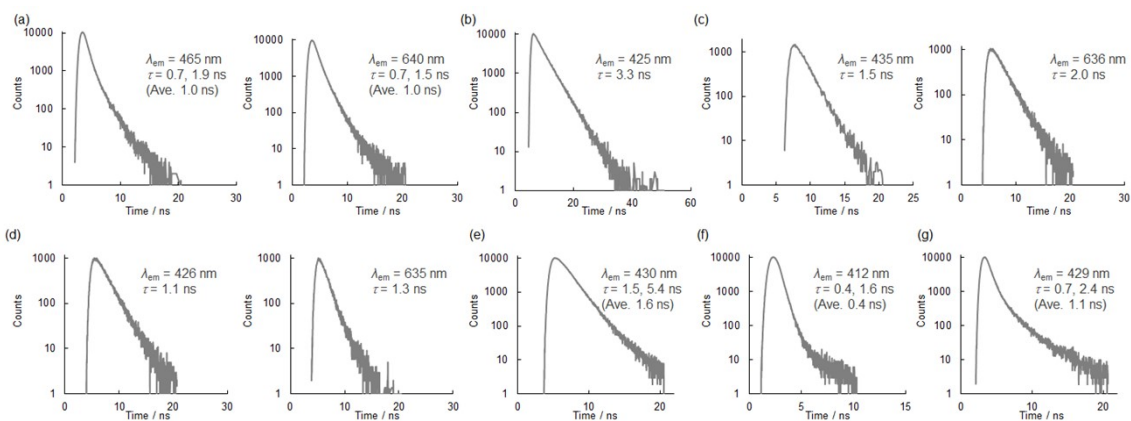

**Figure S17.** The emission decay kinetics of (a) **2-1**, (b) **2-2**, (c) **3**, (d) **4**, (e) **5**, (f) **6**, and (g) **7** at 298 K in the solid states (excited at 340 nm (**3-5**) or 365 nm (**2-1**, **2-2**, **6**, and **7**)). For **2-1**, **3** and **4**, the decay kinetics of the longer-wavelength emissions (monitored at 640 nm (**2-1**), 636 nm (**3**), 635 nm (**4**)) were also measured after UV-irradiation to partially decompose the solid samples.

## 5. XRD data for crystal polymorphs of 2

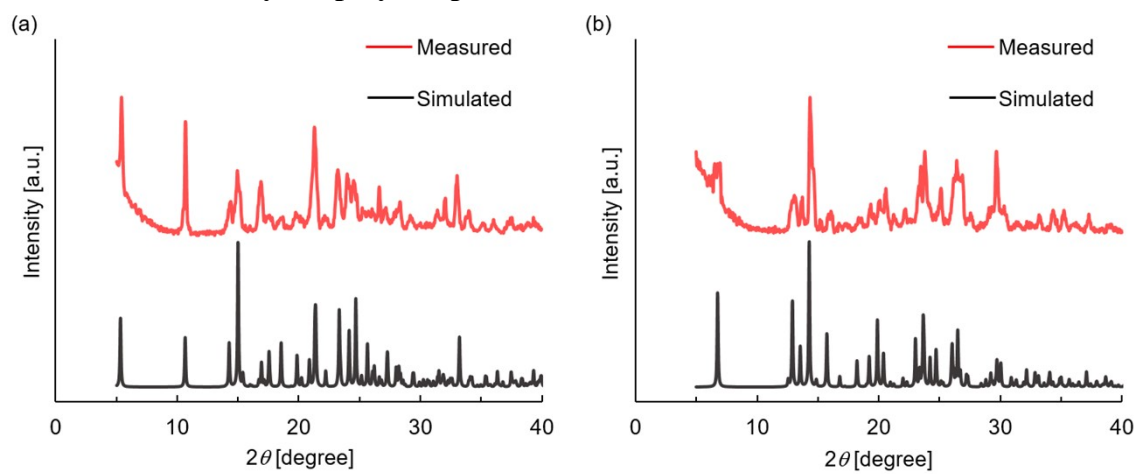

**Figure S18.** PXRD patterns of (a) 2-1 and (b) 2-2: measured and simulated by the single crystal XRD data.

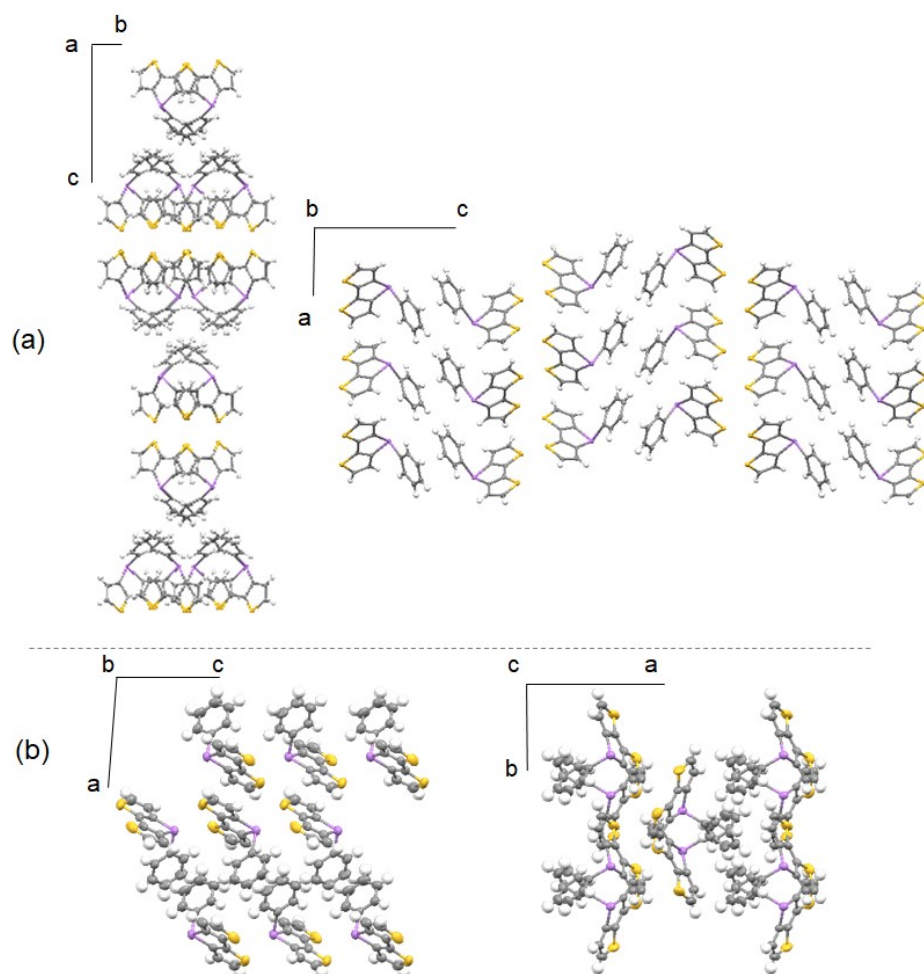

**Figure S19.** Crystal packing of (a) 2-1 and (b) 2-2.

## 6. ESR data

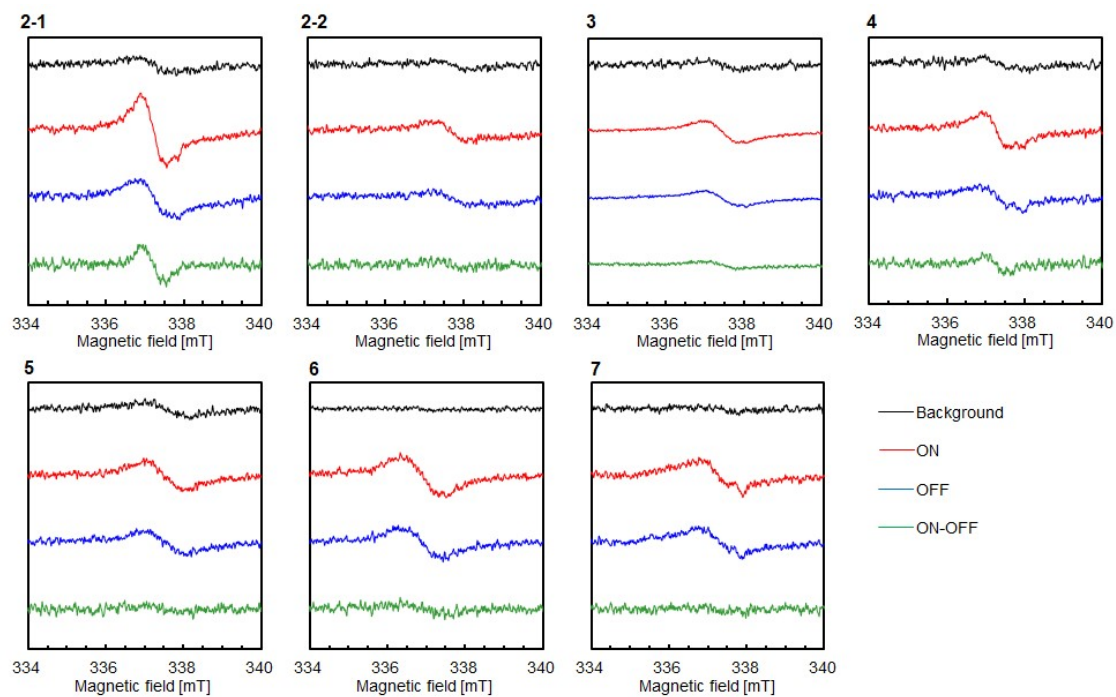

**Figure S20.** ESR spectra of (c) 2-1 and (d) 2-2 before (black), during (red), and after (blue) UV-irradiation. Difference in the spectra during and after UV-irradiation is also shown (green).

## 7. DFT calculations

### Cartesian coordinates in the structures optimized by DFT calculations

**2** ( $S_0$ ):  $E(\text{B3LYP}/\text{def2svp}) = -3570.296517$  hartree

| Number | Atom | X        | Y        | Z        |
|--------|------|----------|----------|----------|
| 1      | As   | 0.540255 | -2.1E-05 | -1.38286 |
| 2      | S    | -2.79466 | -1.89045 | 0.783042 |
| 3      | S    | -2.79457 | 1.890537 | 0.783073 |
| 4      | C    | -0.62404 | -1.33276 | -0.52279 |
| 5      | C    | -1.69345 | -0.7234  | 0.121026 |
| 6      | C    | -1.69343 | 0.723442 | 0.121025 |
| 7      | C    | -0.62399 | 1.332762 | -0.5228  |
| 8      | C    | -0.70131 | -2.75435 | -0.48567 |
| 9      | C    | -1.81229 | -3.19918 | 0.191674 |
| 10     | C    | -1.81218 | 3.19923  | 0.191669 |
| 11     | C    | -0.70121 | 2.754358 | -0.48567 |
| 12     | C    | 2.076826 | -3E-05   | -0.13335 |
| 13     | C    | 1.933971 | -8.2E-05 | 1.262892 |
| 14     | C    | 3.062962 | -8.2E-05 | 2.084975 |
| 15     | C    | 4.345275 | -3E-05   | 1.521808 |
| 16     | C    | 4.494572 | 2.05E-05 | 0.133457 |
| 17     | C    | 3.362817 | 1.96E-05 | -0.69162 |
| 18     | H    | 0.030952 | -3.42892 | -0.93241 |
| 19     | H    | -2.11813 | -4.22726 | 0.381489 |
| 20     | H    | -2.11798 | 4.227323 | 0.38147  |
| 21     | H    | 0.031073 | 3.4289   | -0.93242 |
| 22     | H    | 0.936578 | -0.00012 | 1.709741 |
| 23     | H    | 2.942949 | -0.00012 | 3.171731 |
| 24     | H    | 5.226902 | -3E-05   | 2.168124 |
| 25     | H    | 5.492874 | 6.02E-05 | -0.31225 |
| 26     | H    | 3.487015 | 5.69E-05 | -1.77863 |

**2** ( $S_0$ ):  $E(\text{B3LYP}/6\text{-}31\text{G}+(\text{d},\text{p})) = -3569.101740$  hartree

| Number | Atom | X | Y | Z |
|--------|------|---|---|---|
|--------|------|---|---|---|

|    |    |          |          |          |
|----|----|----------|----------|----------|
| 1  | As | 0.533399 | -7.7E-06 | -1.34334 |
| 2  | S  | -2.81682 | -1.89274 | 0.758685 |
| 3  | S  | -2.81681 | 1.892756 | 0.758683 |
| 4  | C  | -0.61293 | -1.32915 | -0.48739 |
| 5  | C  | -1.69238 | -0.72257 | 0.135222 |
| 6  | C  | -1.69238 | 0.722581 | 0.135216 |
| 7  | C  | -0.61293 | 1.329146 | -0.4874  |
| 8  | C  | -0.69772 | -2.74914 | -0.47439 |
| 9  | C  | -1.82072 | -3.20096 | 0.172234 |
| 10 | C  | -1.8207  | 3.200967 | 0.172223 |
| 11 | C  | -0.6977  | 2.749139 | -0.4744  |
| 12 | C  | 2.083583 | -4.3E-06 | -0.13705 |
| 13 | C  | 1.968268 | 5E-07    | 1.258456 |
| 14 | C  | 3.107039 | 2.3E-06  | 2.064235 |
| 15 | C  | 4.379154 | -1.1E-06 | 1.479709 |
| 16 | C  | 4.50421  | -6E-06   | 0.089426 |
| 17 | C  | 3.358388 | -7.8E-06 | -0.71445 |
| 18 | H  | 0.037522 | -3.41404 | -0.91325 |
| 19 | H  | -2.13217 | -4.22263 | 0.342367 |
| 20 | H  | -2.13214 | 4.222644 | 0.342354 |
| 21 | H  | 0.037544 | 3.414026 | -0.91327 |
| 22 | H  | 0.984989 | 2.9E-06  | 1.719917 |
| 23 | H  | 3.00462  | 6.1E-06  | 3.145878 |
| 24 | H  | 5.266367 | 1E-07    | 2.106533 |
| 25 | H  | 5.488115 | -8.9E-06 | -0.37121 |
| 26 | H  | 3.461916 | -1.2E-05 | -1.79673 |

**2 (S<sub>1</sub>):**  $E(\text{B3LYP}/6\text{-}31\text{G}+(\text{d},\text{p})) = -3568.980284$  hartree

| Number | Atom | X        | Y        | Z        |
|--------|------|----------|----------|----------|
| 1      | As   | 0.553409 | 0.000156 | -1.40472 |
| 2      | S    | -2.78197 | -1.88905 | 0.877292 |
| 3      | S    | -2.7819  | 1.888976 | 0.877725 |
| 4      | C    | -0.61278 | -1.30423 | -0.56541 |
| 5      | C    | -1.66331 | -0.69131 | 0.226945 |

|    |   |          |          |          |
|----|---|----------|----------|----------|
| 6  | C | -1.6633  | 0.691342 | 0.227081 |
| 7  | C | -0.6128  | 1.304389 | -0.56521 |
| 8  | C | -0.78654 | -2.69291 | -0.65096 |
| 9  | C | -1.87327 | -3.15964 | 0.071031 |
| 10 | C | -1.87322 | 3.159705 | 0.071654 |
| 11 | C | -0.78653 | 2.693084 | -0.65048 |
| 12 | C | 2.108811 | -5.5E-05 | -0.11351 |
| 13 | C | 1.955169 | -0.00077 | 1.277553 |
| 14 | C | 3.071958 | -0.00087 | 2.116567 |
| 15 | C | 4.358594 | -0.00025 | 1.565531 |
| 16 | C | 4.521879 | 0.000445 | 0.177453 |
| 17 | C | 3.39755  | 0.000541 | -0.65554 |
| 18 | H | -0.13721 | -3.36036 | -1.20687 |
| 19 | H | -2.19936 | -4.18626 | 0.177947 |
| 20 | H | -2.19928 | 4.186302 | 0.178767 |
| 21 | H | -0.13721 | 3.360624 | -1.20629 |
| 22 | H | 0.960159 | -0.00127 | 1.715027 |
| 23 | H | 2.942412 | -0.00142 | 3.195772 |
| 24 | H | 5.229052 | -0.00033 | 2.215675 |
| 25 | H | 5.519461 | 0.000901 | -0.25431 |
| 26 | H | 3.528005 | 0.00108  | -1.7366  |

---

**3** ( $S_0$ ):  $E(\text{B3LYP}/\text{def2svp}) = -3907.084005$  hartree

| Number | Atom | X        | Y        | Z        |
|--------|------|----------|----------|----------|
| 1      | As   | -0.93003 | -0.02607 | 1.665337 |
| 2      | S    | -3.53033 | 1.921995 | -1.30313 |
| 3      | S    | -3.55552 | -1.85913 | -1.35414 |
| 4      | C    | -1.80524 | 1.328112 | 0.539149 |
| 5      | C    | -2.66077 | 0.736405 | -0.38171 |
| 6      | C    | -2.67051 | -0.71048 | -0.40116 |
| 7      | C    | -1.82327 | -1.33811 | 0.50337  |
| 8      | C    | -1.85975 | 2.7507   | 0.502846 |
| 9      | C    | -2.73979 | 3.213785 | -0.44684 |
| 10     | C    | -2.78255 | -3.18389 | -0.53299 |



|    |   |          |          |          |
|----|---|----------|----------|----------|
| 11 | C | -1.89675 | -2.75831 | 0.428839 |
| 12 | C | 0.883052 | -0.02793 | 0.858003 |
| 13 | C | 1.108189 | 0.00616  | -0.52703 |
| 14 | C | 2.40781  | 0.001411 | -1.03101 |
| 15 | C | 3.501029 | -0.0361  | -0.1531  |
| 16 | C | 3.28715  | -0.07327 | 1.226888 |
| 17 | C | 1.980652 | -0.06873 | 1.727476 |
| 18 | H | -1.27467 | 3.413009 | 1.142991 |
| 19 | H | -2.97597 | 4.246916 | -0.69863 |
| 20 | H | -3.03241 | -4.20663 | -0.81246 |
| 21 | H | -1.32083 | -3.44537 | 1.050953 |
| 22 | H | 0.262577 | 0.033533 | -1.21832 |
| 23 | H | 2.57734  | 0.019869 | -2.10971 |
| 24 | H | 4.137853 | -0.11135 | 1.909691 |
| 25 | H | 1.822665 | -0.09976 | 2.809236 |
| 26 | C | 4.903451 | 0.011368 | -0.70772 |
| 27 | F | 5.009334 | -0.68567 | -1.85345 |
| 28 | F | 5.28297  | 1.274435 | -0.98437 |
| 29 | F | 5.804569 | -0.48903 | 0.155179 |

---

**4** ( $S_0$ ):  $E(\text{B3LYP/def2svp}) = -3609.585632$  hartree

| Number | Atom | X        | Y        | Z        |
|--------|------|----------|----------|----------|
| 1      | As   | 0.073905 | -1.4E-05 | 1.526014 |
| 2      | S    | -2.96888 | 1.890554 | -1.03546 |
| 3      | S    | -2.96917 | -1.89036 | -1.03524 |
| 4      | C    | -0.97574 | 1.332638 | 0.528359 |
| 5      | C    | -1.95763 | 0.723455 | -0.24239 |
| 6      | C    | -1.95771 | -0.72333 | -0.24235 |
| 7      | C    | -0.97588 | -1.33258 | 0.528425 |
| 8      | C    | -1.04756 | 2.754257 | 0.481308 |
| 9      | C    | -2.06657 | 3.199333 | -0.32765 |
| 10     | C    | -2.06701 | -3.19921 | -0.32735 |
| 11     | C    | -1.0479  | -2.75419 | 0.481518 |
| 12     | C    | 1.752723 | -5.9E-05 | 0.481765 |

|    |   |          |          |          |
|----|---|----------|----------|----------|
| 13 | C | 1.793478 | -0.00047 | -0.92192 |
| 14 | C | 3.015565 | -0.00045 | -1.59183 |
| 15 | C | 4.235167 | -6.4E-05 | -0.88863 |
| 16 | C | 4.185255 | 0.000422 | 0.511029 |
| 17 | C | 2.960206 | 0.000401 | 1.189968 |
| 18 | H | -0.37574 | 3.428738 | 1.014848 |
| 19 | H | -2.34657 | 4.227454 | -0.55379 |
| 20 | H | -2.34716 | -4.22731 | -0.55339 |
| 21 | H | -0.37615 | -3.42872 | 1.015087 |
| 22 | H | 0.86306  | -0.00078 | -1.49555 |
| 23 | H | 3.027034 | -0.00074 | -2.68627 |
| 24 | H | 5.117252 | 0.00083  | 1.083903 |
| 25 | H | 2.954059 | 0.000756 | 2.284128 |
| 26 | C | 5.548577 | -0.00036 | -1.63174 |
| 27 | H | 5.639519 | 0.885075 | -2.28312 |
| 28 | H | 6.405316 | -0.0002  | -0.94193 |
| 29 | H | 5.639432 | -0.88641 | -2.28236 |

---

**5 (S<sub>0</sub>):  $E(\text{B3LYP}/\text{def2svp}) = -3684.735152$  hartree**

| Number | Atom | X        | Y        | Z        |
|--------|------|----------|----------|----------|
| 1      | As   | -0.27021 | -1.4E-05 | 1.546616 |
| 2      | S    | -3.24533 | 1.890428 | -1.09449 |
| 3      | S    | -3.24558 | -1.89021 | -1.09437 |
| 4      | C    | -1.2935  | 1.332595 | 0.520953 |
| 5      | C    | -2.25516 | 0.723486 | -0.27484 |
| 6      | C    | -2.25525 | -0.72335 | -0.2748  |
| 7      | C    | -1.29366 | -1.33253 | 0.521018 |
| 8      | C    | -1.36401 | 2.754215 | 0.471422 |
| 9      | C    | -2.36157 | 3.199319 | -0.36386 |
| 10     | C    | -2.36198 | -3.19917 | -0.36366 |
| 11     | C    | -1.36435 | -2.75415 | 0.471576 |
| 12     | C    | 1.436445 | -9.5E-05 | 0.558687 |
| 13     | C    | 1.525519 | -0.00047 | -0.84613 |
| 14     | C    | 2.76141  | -0.0005  | -1.47977 |

|    |   |          |          |          |
|----|---|----------|----------|----------|
| 15 | C | 3.950386 | -0.00016 | -0.72345 |
| 16 | C | 3.876145 | 0.00024  | 0.676442 |
| 17 | C | 2.62121  | 0.000257 | 1.301476 |
| 18 | H | -0.70593 | 3.428783 | 1.021741 |
| 19 | H | -2.63507 | 4.227409 | -0.59794 |
| 20 | H | -2.63563 | -4.22724 | -0.59767 |
| 21 | H | -0.70635 | -3.42876 | 1.021934 |
| 22 | H | 0.615078 | -0.00074 | -1.45087 |
| 23 | H | 2.842155 | -0.00078 | -2.56893 |
| 24 | H | 4.777722 | 0.000573 | 1.289454 |
| 25 | H | 2.580414 | 0.000546 | 2.394946 |
| 26 | O | 5.105419 | -0.00025 | -1.43271 |
| 27 | C | 6.338036 | 0.000093 | -0.74838 |
| 28 | H | 6.457556 | -0.89766 | -0.11517 |
| 29 | H | 7.122787 | -0.00017 | -1.51677 |
| 30 | H | 6.4574   | 0.898374 | -0.11591 |

**6** ( $S_0$ ):  $E(\text{B3LYP/def2svp}) = -3688.153685$  hartree

| Number | Atom | X        | Y        | Z        |
|--------|------|----------|----------|----------|
| 1      | As   | 0.025059 | -0.00282 | 1.281527 |
| 2      | S    | -3.40622 | 1.89283  | -0.69575 |
| 3      | S    | -3.40953 | -1.88584 | -0.70207 |
| 4      | C    | -1.13734 | 1.332157 | 0.433993 |
| 5      | C    | -2.26082 | 0.723453 | -0.11492 |
| 6      | C    | -2.26209 | -0.72043 | -0.11732 |
| 7      | C    | -1.1397  | -1.33294 | 0.429582 |
| 8      | C    | -1.21328 | 2.754329 | 0.395494 |
| 9      | C    | -2.3722  | 3.200225 | -0.19497 |
| 10     | C    | -2.37783 | -3.19672 | -0.20563 |
| 11     | C    | -1.21814 | -2.75483 | 0.386345 |
| 12     | C    | 1.721265 | -0.00212 | 0.236369 |
| 13     | C    | 1.819207 | -0.0002  | -1.17664 |
| 14     | C    | 3.09412  | -0.00034 | -1.76674 |
| 15     | C    | 4.270671 | -0.00156 | -1.01364 |

|    |   |          |          |          |
|----|---|----------|----------|----------|
| 16 | C | 4.1505   | -0.005   | 0.380782 |
| 17 | C | 2.904784 | -0.00491 | 1.021918 |
| 18 | H | -0.4448  | 3.428373 | 0.777677 |
| 19 | H | -2.68669 | 4.228757 | -0.36771 |
| 20 | H | -2.69412 | -4.22411 | -0.38181 |
| 21 | H | -0.45086 | -3.4315  | 0.766287 |
| 22 | H | 3.162157 | -5.5E-05 | -2.85878 |
| 23 | H | 5.05697  | -0.00845 | 0.994097 |
| 24 | C | 0.619687 | 0.000721 | -2.09082 |
| 25 | H | -0.01556 | -0.8826  | -1.92605 |
| 26 | H | -0.01663 | 0.882619 | -1.92273 |
| 27 | H | 0.93395  | 0.002905 | -3.14441 |
| 28 | C | 2.892894 | -0.00912 | 2.538407 |
| 29 | H | 2.379162 | 0.872764 | 2.95332  |
| 30 | H | 2.377844 | -0.89249 | 2.948537 |
| 31 | H | 3.920738 | -0.01094 | 2.929517 |
| 32 | C | 5.628802 | 0.011082 | -1.67113 |
| 33 | H | 6.15699  | 0.95982  | -1.47444 |
| 34 | H | 6.269728 | -0.79779 | -1.28349 |
| 35 | H | 5.553005 | -0.10889 | -2.76189 |

**6** ( $S_0$ ):  $E(\text{B3LYP}/6\text{-}31\text{G}+(\text{d},\text{p})) = -3687.058323$  hartree

| Number | Atom | X        | Y        | Z        |
|--------|------|----------|----------|----------|
| 1      | As   | 0.02894  | -0.00036 | 1.253596 |
| 2      | S    | -3.41053 | 1.89016  | -0.68283 |
| 3      | S    | -3.41089 | -1.88958 | -0.68347 |
| 4      | C    | -1.12522 | 1.330346 | 0.4149   |
| 5      | C    | -2.25027 | 0.721122 | -0.12238 |
| 6      | C    | -2.25037 | -0.72094 | -0.1227  |
| 7      | C    | -1.12538 | -1.33055 | 0.414271 |
| 8      | C    | -1.20596 | 2.751016 | 0.389567 |
| 9      | C    | -2.36881 | 3.19993  | -0.18472 |
| 10     | C    | -2.36928 | -3.19971 | -0.18606 |
| 11     | C    | -1.20636 | -2.7512  | 0.388404 |

|    |   |          |          |          |
|----|---|----------|----------|----------|
| 12 | C | 1.711507 | -0.00019 | 0.230999 |
| 13 | C | 1.820948 | 0.000314 | -1.17735 |
| 14 | C | 3.098029 | 0.000514 | -1.75821 |
| 15 | C | 4.26522  | 0.00025  | -0.99274 |
| 16 | C | 4.135363 | -0.00029 | 0.399174 |
| 17 | C | 2.884015 | -0.00047 | 1.025681 |
| 18 | H | -0.43794 | 3.417238 | 0.765999 |
| 19 | H | -2.68594 | 4.221208 | -0.34698 |
| 20 | H | -2.68653 | -4.22087 | -0.34879 |
| 21 | H | -0.4384  | -3.41769 | 0.764501 |
| 22 | H | 3.177119 | 0.000861 | -2.84298 |
| 23 | H | 5.031562 | -0.00057 | 1.016047 |
| 24 | C | 0.627326 | 0.000661 | -2.10147 |
| 25 | H | -0.00601 | -0.87713 | -1.94376 |
| 26 | H | -0.00547 | 0.878855 | -1.94374 |
| 27 | H | 0.953439 | 0.000573 | -3.14502 |
| 28 | C | 2.856613 | -0.00097 | 2.543669 |
| 29 | H | 2.342831 | 0.877652 | 2.947532 |
| 30 | H | 2.34123  | -0.87885 | 2.947027 |
| 31 | H | 3.876469 | -0.00199 | 2.938221 |
| 32 | C | 5.628643 | 0.000448 | -1.64248 |
| 33 | H | 6.208797 | 0.88256  | -1.34694 |
| 34 | H | 6.209173 | -0.88134 | -1.34673 |
| 35 | H | 5.551282 | 0.000307 | -2.73339 |

**6 (S<sub>1</sub>):**  $E(\text{B3LYP}/6\text{-}31\text{G}+(\text{d,p})) = -3686.934836$  hartree

| Number | Atom | X        | Y        | Z        |
|--------|------|----------|----------|----------|
| 1      | As   | -0.03665 | 0.003602 | 1.329263 |
| 2      | S    | 3.484625 | -1.81969 | -0.72616 |
| 3      | S    | 3.312118 | 1.957516 | -0.88225 |
| 4      | C    | 1.212187 | -1.27835 | 0.570708 |
| 5      | C    | 2.287836 | -0.64659 | -0.16968 |
| 6      | C    | 2.228671 | 0.732009 | -0.22065 |
| 7      | C    | 1.0774   | 1.323111 | 0.436805 |

|    |   |          |          |          |
|----|---|----------|----------|----------|
| 8  | C | 1.418463 | -2.65966 | 0.687455 |
| 9  | C | 2.564386 | -3.10337 | 0.04386  |
| 10 | C | 2.236218 | 3.213714 | -0.28599 |
| 11 | C | 1.131758 | 2.723705 | 0.393096 |
| 12 | C | -1.74651 | -0.02    | 0.226056 |
| 13 | C | -1.82484 | -0.18059 | -1.17279 |
| 14 | C | -3.08655 | -0.22276 | -1.78502 |
| 15 | C | -4.27099 | -0.11036 | -1.05294 |
| 16 | C | -4.17205 | 0.051163 | 0.332237 |
| 17 | C | -2.93396 | 0.09511  | 0.985586 |
| 18 | H | 0.754958 | -3.33836 | 1.21233  |
| 19 | H | 2.934577 | -4.1193  | -0.00945 |
| 20 | H | 2.487825 | 4.250442 | -0.46962 |
| 21 | H | 0.384383 | 3.380711 | 0.824611 |
| 22 | H | -3.14178 | -0.34545 | -2.86511 |
| 23 | H | -5.08228 | 0.147791 | 0.921687 |
| 24 | C | -0.60548 | -0.30961 | -2.05744 |
| 25 | H | 0.053752 | 0.559516 | -1.97338 |
| 26 | H | -0.00575 | -1.18656 | -1.79348 |
| 27 | H | -0.90272 | -0.40763 | -3.10541 |
| 28 | C | -2.93937 | 0.274136 | 2.494201 |
| 29 | H | -2.46134 | -0.56507 | 3.010125 |
| 30 | H | -2.40563 | 1.178105 | 2.806192 |
| 31 | H | -3.96725 | 0.352307 | 2.860159 |
| 32 | C | -5.61973 | -0.16391 | -1.73103 |
| 33 | H | -6.18975 | -1.04497 | -1.412   |
| 34 | H | -6.22409 | 0.717009 | -1.48539 |
| 35 | H | -5.51805 | -0.20914 | -2.81921 |

---

**7 (S<sub>0</sub>):**  $E(\text{B3LYP}/\text{def2svp}) = -3923.856060$  hartree

| Number | Atom | X        | Y        | Z        |
|--------|------|----------|----------|----------|
| 1      | As   | -0.76172 | 1.375269 | 0.000219 |
| 2      | S    | -4.14632 | -0.67527 | -1.88983 |
| 3      | S    | -4.14602 | -0.67617 | 1.889858 |

|    |   |          |          |          |
|----|---|----------|----------|----------|
| 4  | C | -1.88974 | 0.482941 | -1.33308 |
| 5  | C | -3.00694 | -0.07883 | -0.72184 |
| 6  | C | -3.00683 | -0.07914 | 0.721968 |
| 7  | C | -1.88956 | 0.48238  | 1.333291 |
| 8  | C | -1.96913 | 0.444768 | -2.75535 |
| 9  | C | -3.1212  | -0.16059 | -3.19856 |
| 10 | C | -3.12065 | -0.16213 | 3.198663 |
| 11 | C | -1.96868 | 0.44347  | 2.75555  |
| 12 | C | 1.012903 | 0.450679 | 1.25E-05 |
| 13 | C | 1.203037 | -0.9588  | -0.00024 |
| 14 | C | 2.508993 | -1.46625 | -0.00027 |
| 15 | C | 3.640493 | -0.64298 | -4.9E-05 |
| 16 | C | 3.430471 | 0.735951 | 0.000207 |
| 17 | C | 2.147241 | 1.308097 | 0.000243 |
| 18 | H | -1.20779 | 0.838499 | -3.43084 |
| 19 | H | -3.43423 | -0.33938 | -4.22652 |
| 20 | H | -3.4335  | -0.34146 | 4.226586 |
| 21 | H | -1.20724 | 0.836883 | 3.431111 |
| 22 | H | 2.64339  | -2.55098 | -0.00047 |
| 23 | H | 4.302766 | 1.395519 | 0.000375 |
| 24 | C | 0.062405 | -1.97405 | -0.00053 |
| 25 | H | -0.87981 | -1.42098 | -0.00061 |
| 26 | C | 2.079903 | 2.839703 | 0.000491 |
| 27 | H | 1.021996 | 3.135785 | 0.000638 |
| 28 | C | 5.04991  | -1.22071 | -0.0001  |
| 29 | H | 5.744537 | -0.36262 | 0.000353 |
| 30 | C | 2.703913 | 3.44179  | -1.27089 |
| 31 | H | 2.582711 | 4.537521 | -1.27838 |
| 32 | H | 3.782807 | 3.227379 | -1.34142 |
| 33 | H | 2.225613 | 3.042136 | -2.17914 |
| 34 | C | 2.704162 | 3.441418 | 1.271923 |
| 35 | H | 2.226098 | 3.041438 | 2.180151 |
| 36 | H | 3.783089 | 3.227071 | 1.34215  |
| 37 | H | 2.582871 | 4.537138 | 1.279795 |
| 38 | C | 5.335217 | -2.04132 | 1.269693 |

|    |   |          |          |          |
|----|---|----------|----------|----------|
| 39 | H | 6.380152 | -2.39245 | 1.280679 |
| 40 | H | 5.166724 | -1.44371 | 2.179206 |
| 41 | H | 4.685927 | -2.93024 | 1.328976 |
| 42 | C | 5.335504 | -2.04021 | -1.27056 |
| 43 | H | 4.686175 | -2.92904 | -1.33077 |
| 44 | H | 5.167256 | -1.44179 | -2.17958 |
| 45 | H | 6.380426 | -2.39138 | -1.2816  |
| 46 | C | 0.066874 | -2.84176 | -1.27164 |
| 47 | H | 0.02455  | -2.21972 | -2.17902 |
| 48 | H | 0.967838 | -3.47391 | -1.33662 |
| 49 | H | -0.80915 | -3.51077 | -1.2813  |
| 50 | C | 0.066541 | -2.8421  | 1.270354 |
| 51 | H | 0.023985 | -2.22029 | 2.177881 |
| 52 | H | -0.80949 | -3.51111 | 1.279618 |
| 53 | H | 0.967501 | -3.47425 | 1.335366 |

---
